# Supplementary material for: Unveiling the structure of aqueous magnesium nitrate solutions by combining X-ray diffraction and theoretical calculations
Source: Royal Society of Chemistry journal article supplement (doi:10.1039/d2cp01828d), 2022-01-01
Supplement: d2cp01828d1.pdf [file d2cp01828d1.pdf]

## Supporting Information

### Unveiling the structure of aqueous magnesium nitrate solutions by combining X-ray diffraction and theoretical calculations

Yunxia Wang,<sup>a,b</sup> Guangguo Wang,<sup>a,b</sup> Daniel T. Bowron,<sup>c</sup> Fayan Zhu,<sup>\* a, c</sup> Alex C. Hannon,<sup>\* c</sup> Yongquan Zhou,<sup>a</sup>  
Xing Liu,<sup>d</sup> Guosheng Shi,<sup>a, d, e</sup>

<sup>a</sup> Key Laboratory of Comprehensive and Highly Efficient Utilization of Salt Lake Resources, Qinghai Provincial Key Laboratory of Resources Chemistry of Salt Lakes, Qinghai Institute of Salt Lakes, Chinese Academy of Sciences, Xining 81008, China

<sup>b</sup> University of Chinese Academy of Sciences, Beijing 100049, China

<sup>c</sup> ISIS Facility, STFC, Rutherford Appleton Laboratory, Chilton, Didcot, Oxon OX11 0QX, UK e.

<sup>d</sup> Shanghai Applied Radiation Institute, Shanghai University, Shanghai 200444, China.

<sup>e</sup> Wenzhou Institute, University of Chinese Academy of Sciences, Wenzhou 325001, China

EPSR simulations were carried out at 300 K, and L-J parameters did not change before and after simulation. After 800-2000 steps, the system reached equilibrium state, and the empirical potential values  $\epsilon_{req}$  for structural refinement ranges from 5.5 to 9 for the studied systems. The energy, pressure and R-factor at each iteration in the EPSR refinements are shown in the Fig. S1, and the energy variation range after the accumulative process is less than 210 kJ/mol. A full charge and scaled charges 1.5, 1.7 and 1.9 for  $Mg^{2+}$  ions and -0.75, -0.85 and -0.95 for  $NO_3^-$  ions were used to perform EPSR simulations to effectively include the polarization effect. As shown in Table S4, the coordination number nearly keep constant whether scaled charge was used or not. However, the scaled charge has a major effect on the interaction distance such as Mg-O(W), Mg-N, Mg-O( $NO_3$ ), etc. As shown in Tables S4 and S5, the  $r_{Mg-O(W)} \sim 2.10$  Å obtained from EPSR using full charge and a scaled charge 1.9 are close to 2.05-2.11 Å in the literatures [1-7]. These EPSR results are also close to our AIMD conclusion. But the  $r_{Mg-O(W)}$  with scaled charges of 1.7 and 1.5 are larger than that of the literatures value 2.11 Å [1-7]. Especially, the  $r_{Mg-O(W)} \sim 2.16$  Å with a scaled charge 1.5 cannot be found in previous work. In addition, there is little discrepancy of the second peak in the Mg-O(N) RDFs using full charge and scaled charges (Figs. S2 and S3). For comparison purposes, the RDFs for four atom pairs are also shown in Figs. S2 and S3. There is a small difference between these figures at the same concentration. Based on above, the EPSR simulations using full charge present reasonable results for aqueous  $Mg(NO_3)_2$  solutions.

**Table S1** Cubic box parameters for the EPSR refinements and AIMD simulations.

| WSR | $\rho(\text{g/cm}^3)$ | Number<br>density<br>(atoms per $\text{\AA}^3$ ) | EPSR            |                   |                          |                               | AIMD            |                   |                          |                               |
|-----|-----------------------|--------------------------------------------------|-----------------|-------------------|--------------------------|-------------------------------|-----------------|-------------------|--------------------------|-------------------------------|
|     |                       |                                                  | $n_{\text{Mg}}$ | $n_{\text{NO}_3}$ | $n_{\text{H}_2\text{O}}$ | Side length<br>/ $\text{\AA}$ | $n_{\text{Mg}}$ | $n_{\text{NO}_3}$ | $n_{\text{H}_2\text{O}}$ | Side length<br>/ $\text{\AA}$ |
| 100 | 1.0563                | 0.10082                                          | 30              | 60                | 3000                     | 45.13                         | 1               | 2                 | 100                      | 14.5257                       |
| 60  | 1.0935                | 0.10123                                          | 50              | 100               | 3000                     | 45.36                         | 2               | 4                 | 120                      | 15.5141                       |
| 30  | 1.1770                | 0.10193                                          | 100             | 200               | 3000                     | 45.97                         | 4               | 8                 | 120                      | 15.7204                       |
| 15  | 1.3690                | 0.10245                                          | 200             | 400               | 3000                     | 47.24                         | 7               | 14                | 105                      | 15.4523                       |

**Table S2** Lennard-Jones parameters and effective atomic charges used to start the EPSR refinements.

|    | $\varepsilon(\text{kJ.mol}^{-1})$ | $\sigma(\text{\AA})$ | Mass    | Charge<br>(full) | Charge<br>(1.9) | Charge<br>(1.7) | Charge<br>(1.5) |
|----|-----------------------------------|----------------------|---------|------------------|-----------------|-----------------|-----------------|
| Mg | 0.4593                            | 2.1                  | 24.3050 | 2.0              | 1.9             | 1.7             | 1.5             |
| N  | 0.8375                            | 3.9                  | 14.0070 | 0.8603           | 0.8173          | 0.7313          | 0.6452          |
| ON | 0.6490                            | 3.1540               | 15.9994 | -0.6201          | 0.5891          | 0.5271          | 0.4651          |
| OW | 0.65000                           | 3.1600               | 15.9999 | -0.8476          | -               | -               | -               |
| OH | 0                                 | 0                    | 2.0000  | 0.4238           | -               | -               | -               |

**Table S3** Bond distances and bond angles in the EPSR refinements.

|                      |     | Bond distances ( $\text{\AA}$ ) |        | Bond angles ( $^\circ$ ) |  |
|----------------------|-----|---------------------------------|--------|--------------------------|--|
| $\text{NO}_3^-$      | N-O | 1.2500                          | O-N-O  | 120.0031                 |  |
|                      |     | 1.2500                          |        | 120.0031                 |  |
|                      |     | 1.2500                          |        | 119.9939                 |  |
| $\text{H}_2\text{O}$ | OW- | 0.9574                          | HW-OW- | 105.2116                 |  |
|                      | HW  | 0.9574                          | HW     |                          |  |

**Table S4** The positions and the average coordination numbers of the atom pairs in aqueous  $\text{Mg}(\text{NO}_3)_2$  solutions obtained from AIMD simulations and EPSR with a full charge and three scaled charges of ions.  $r_{(l,\text{peak})}$  denotes the peak positions of the first shells.  $\text{CN}_I$  represents the average coordination numbers of the first shells.

| Atom pair | WSR | EPSR                             |               | AIMD                             |               | EPSR-0.95                        |               | EPSR-0.85                        |               | EPSR-0.75                        |               |
|-----------|-----|----------------------------------|---------------|----------------------------------|---------------|----------------------------------|---------------|----------------------------------|---------------|----------------------------------|---------------|
|           |     | $r_{(l,\text{peak})}/\text{\AA}$ | $\text{CN}_I$ |
| Mg-       | 100 | 2.10                             | 5.4           | 2.11                             | 6.0           | 2.10                             | 5.5           | 2.13                             | 5.7           | 2.16                             | 5.6           |
| O(W)      | 60  | 2.10                             | 5.3           | 2.09                             | 5.5           | 2.10                             | 5.4           | 2.13                             | 5.7           | 2.16                             | 5.5           |
|           | 30  | 2.10                             | 4.9           | 2.11                             | 4.8           | 2.10                             | 4.9           | 2.13                             | 5.1           | 2.16                             | 5.3           |
|           | 15  | 2.15                             | 4.3           | 2.09                             | 4.6           | 2.10                             | 4.2           | 2.13                             | 4.5           | 2.13                             | 4.8           |

|      |     |      |      |      |      |      |      |      |      |      |      |
|------|-----|------|------|------|------|------|------|------|------|------|------|
| Mg-  | 100 | 2.10 | 0.6  | -    | -    | 2.13 | 0.5  | 2.19 | 0.3  | 2.25 | 0.5  |
| O(N) | 60  | 2.10 | 0.7  | 2.17 | 0.5  | 2.13 | 0.6  | 2.19 | 0.3  | 2.25 | 0.5  |
|      | 30  | 2.09 | 1.1  | 2.17 | 1.3  | 2.13 | 1.1  | 2.19 | 0.9  | 2.25 | 0.7  |
|      | 15  | 2.07 | 1.7  | 2.17 | 1.4  | 2.13 | 1.8  | 2.16 | 1.5  | 2.22 | 1.2  |
| Mg-N | 100 | 3.27 | 0.6  | -    | -    | 3.30 | 0.5  | 3.36 | 0.3  | 3.42 | 0.5  |
|      | 60  | 3.30 | 0.7  | 3.15 | 0.5  | 3.30 | 0.6  | 3.30 | 0.3  | 3.39 | 0.5  |
|      | 30  | 3.28 | 1.1  | 3.13 | 1.2  | 3.30 | 1.1  | 3.36 | 0.9  | 3.36 | 0.7  |
|      | 15  | 3.21 | 1.7  | 3.15 | 1.4  | 3.30 | 1.8  | 3.33 | 1.5  | 3.36 | 1.2  |
| N-OW | 100 | 3.59 | 12.4 | 3.47 | 15.7 | 3.57 | 11.4 | 3.60 | 10.7 | 3.63 | 11.1 |
|      | 60  | 3.58 | 12.8 | 3.47 | 14.9 | 3.57 | 12.4 | 3.60 | 12.4 | 3.60 | 13.0 |
|      | 30  | 3.59 | 12.4 | 3.47 | 14.8 | 3.57 | 12.8 | 3.54 | 12.5 | 3.60 | 12.2 |
|      | 15  | 3.56 | 11.4 | 3.49 | 14.0 | 3.60 | 12.1 | 3.60 | 11.9 | 3.63 | 11.9 |

**Table S5** Average hydration shell distances for Mg<sup>2+</sup>

| Solution                                         | Method    | $r_{\text{Mg-O(w)}/\text{\AA}}$ | Ref |
|--------------------------------------------------|-----------|---------------------------------|-----|
| Mg(NO <sub>3</sub> ) <sub>2</sub>                | XRD       | 2.110, 2.104                    | [1] |
| MgCl <sub>2</sub>                                | ND, MD    | 2.05, 2.10                      | [2] |
| MgCl <sub>2</sub>                                | ND, MC    | 2.10                            | [3] |
| Mg Cl <sub>2</sub>                               | QM/MM, MD | 2.11                            | [4] |
| MgCl <sub>2</sub>                                | XRS, SAXS | 2.10                            | [5] |
| Mg(NO <sub>3</sub> ) <sub>2</sub>                | XRD       | 2.066                           | [6] |
| Mg(H <sub>2</sub> PO <sub>4</sub> ) <sub>2</sub> | XRD       | 2.1                             | [7] |

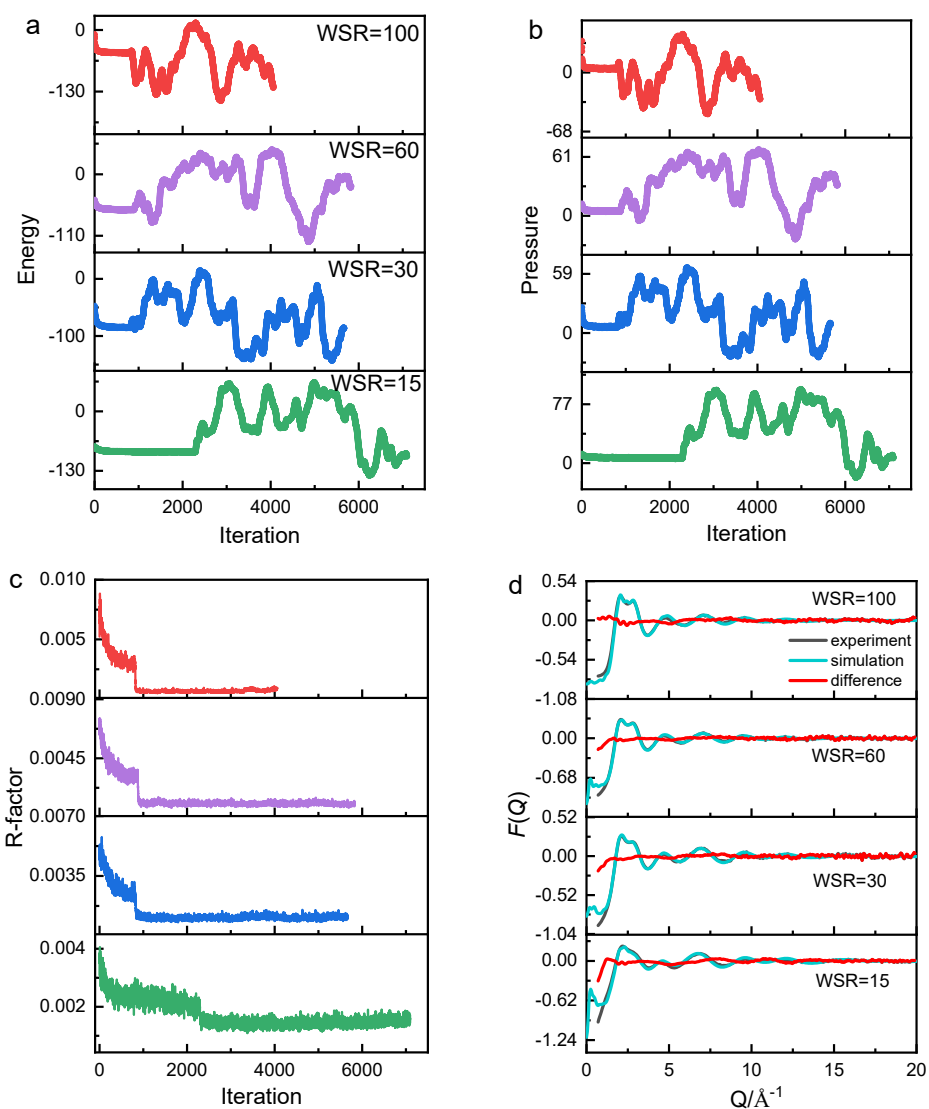

**Fig. S1.** (a) Energy, (b) pressure and (c) R-factor at each iteration in the EPSR refinements. (d) The difference (red lines) of  $F(Q)$  obtained experimentally (black lines) and EPSR simulated (cyan lines) for magnesium nitrate solutions.

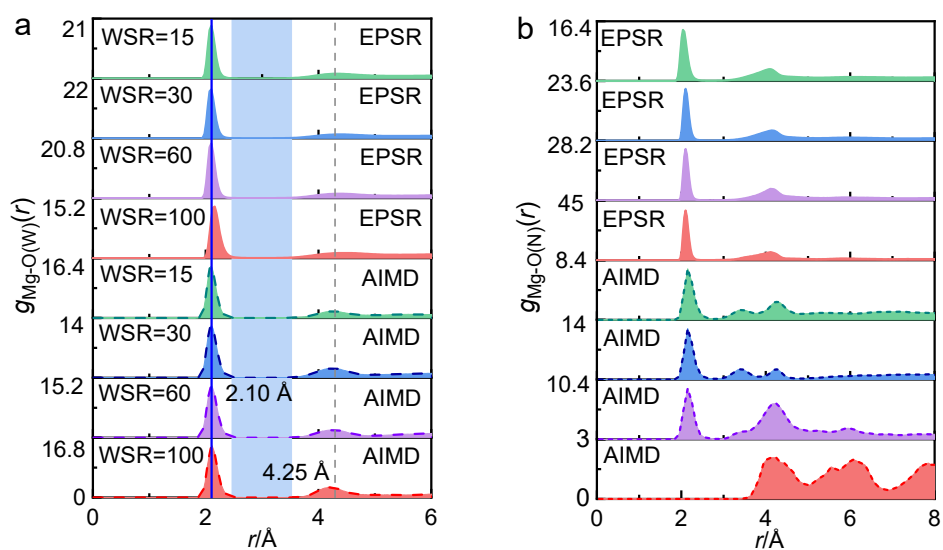

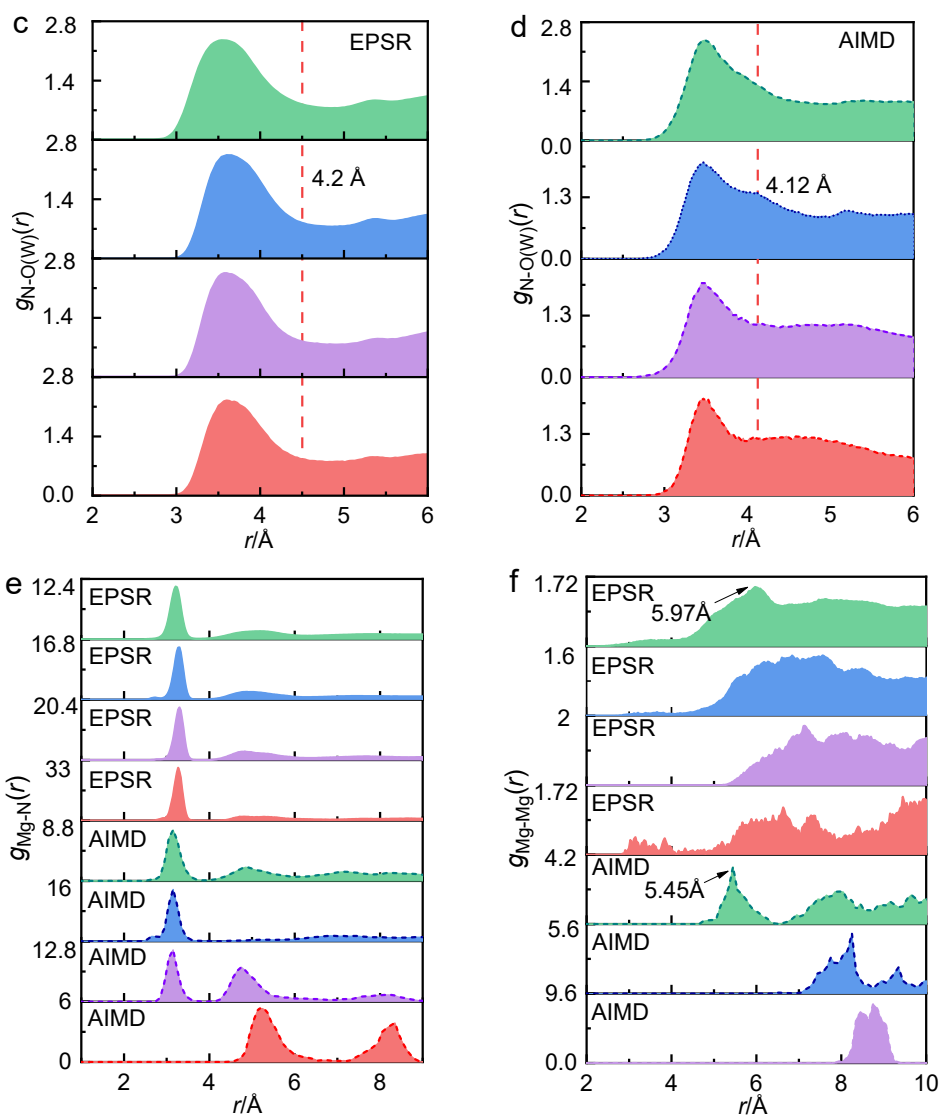

**Fig. S2.** Pair distribution functions of Mg–O(W) (a), Mg–O(N) (b), N–O(W) (c, d), Mg–N (e) and Mg–Mg (f) at different WSR in  $\text{Mg}(\text{NO}_3)_2$  solutions obtained from EPSR using a full charge and AIMD.

When WSR=15, there are 200  $\text{Mg}^{2+}$ , 400  $\text{NO}_3^-$ , and 3000 waters in EPSR box, only 7  $\text{Mg}^{2+}$ , 14  $\text{NO}_3^-$ , and 105 waters in AIMD simulation box (Table S1). From  $g_{\text{Mg-O(N)}}(r)$ , the first peak is at  $\sim 2.1$  Å both of EPSR and AIMD results, while the second peak splits at  $3.0\sim 5.0$  Å of AIMD result (Figs. 5 and S2). It is due to that the EPSR result represents the statistical average, but AIMD result hardly represents the average value because of the little number of ions. But both EPSR and AIMD results confirm that there is qualitatively a broad peak at  $3.0\sim 5.0$  Å.

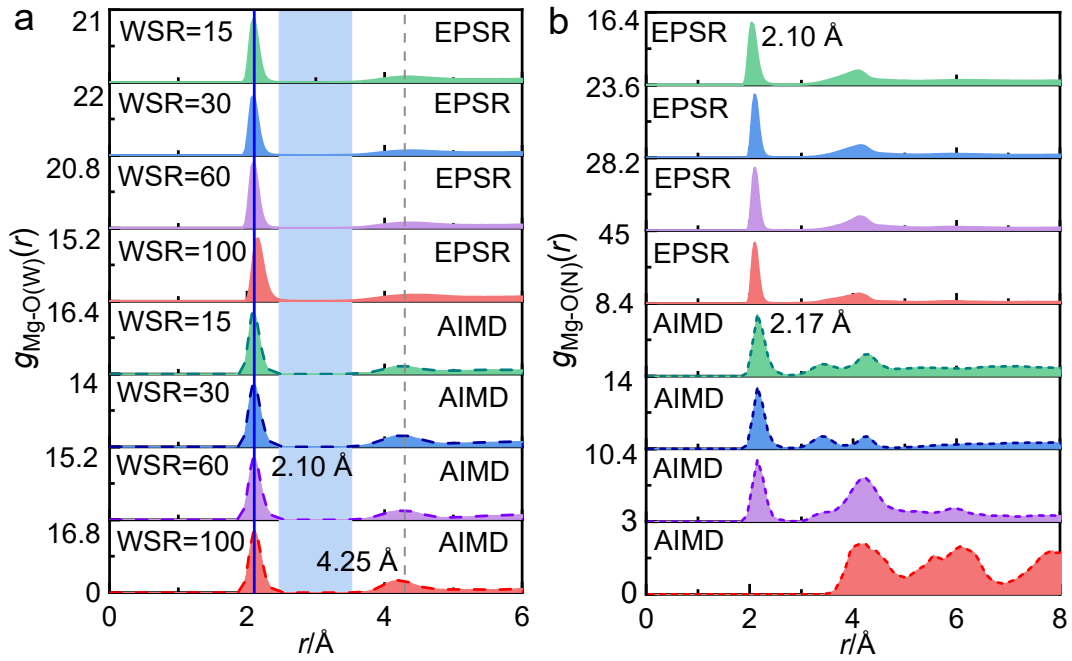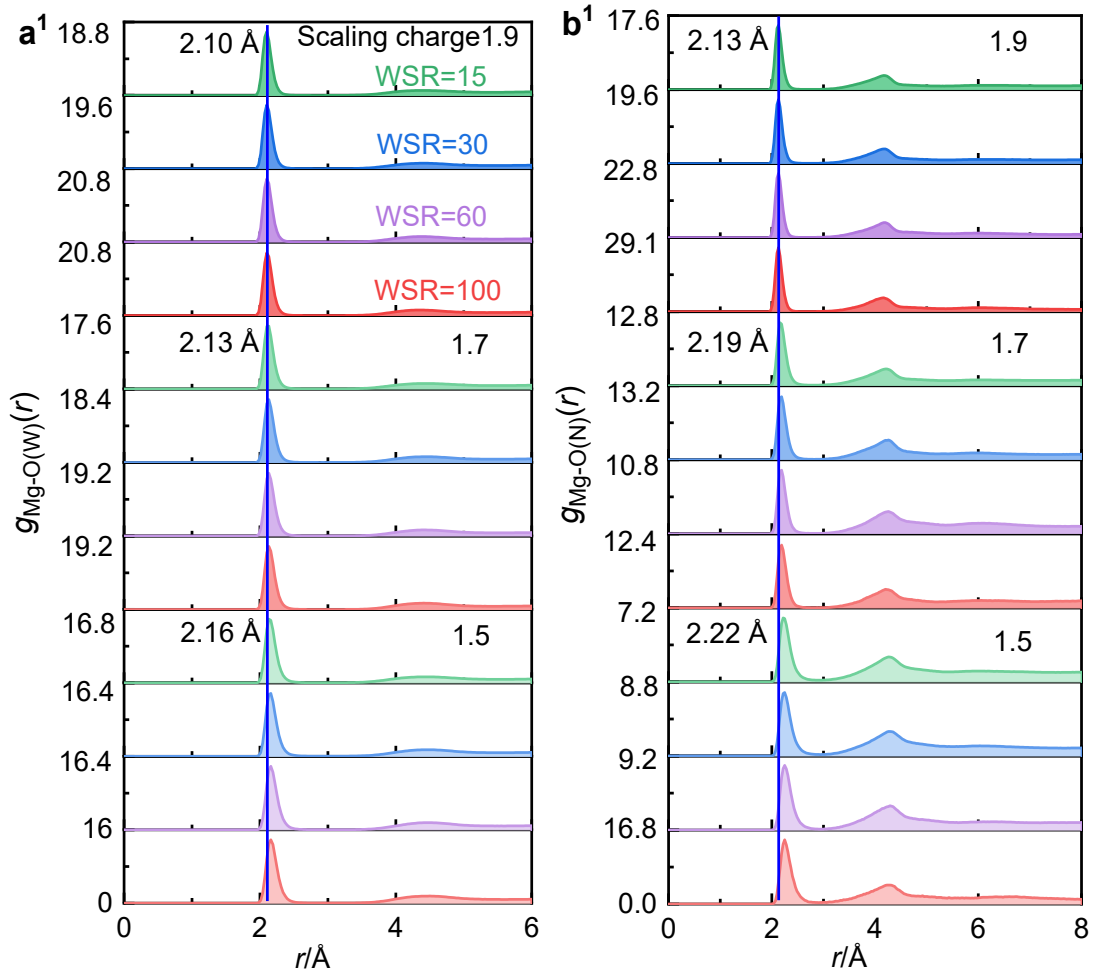

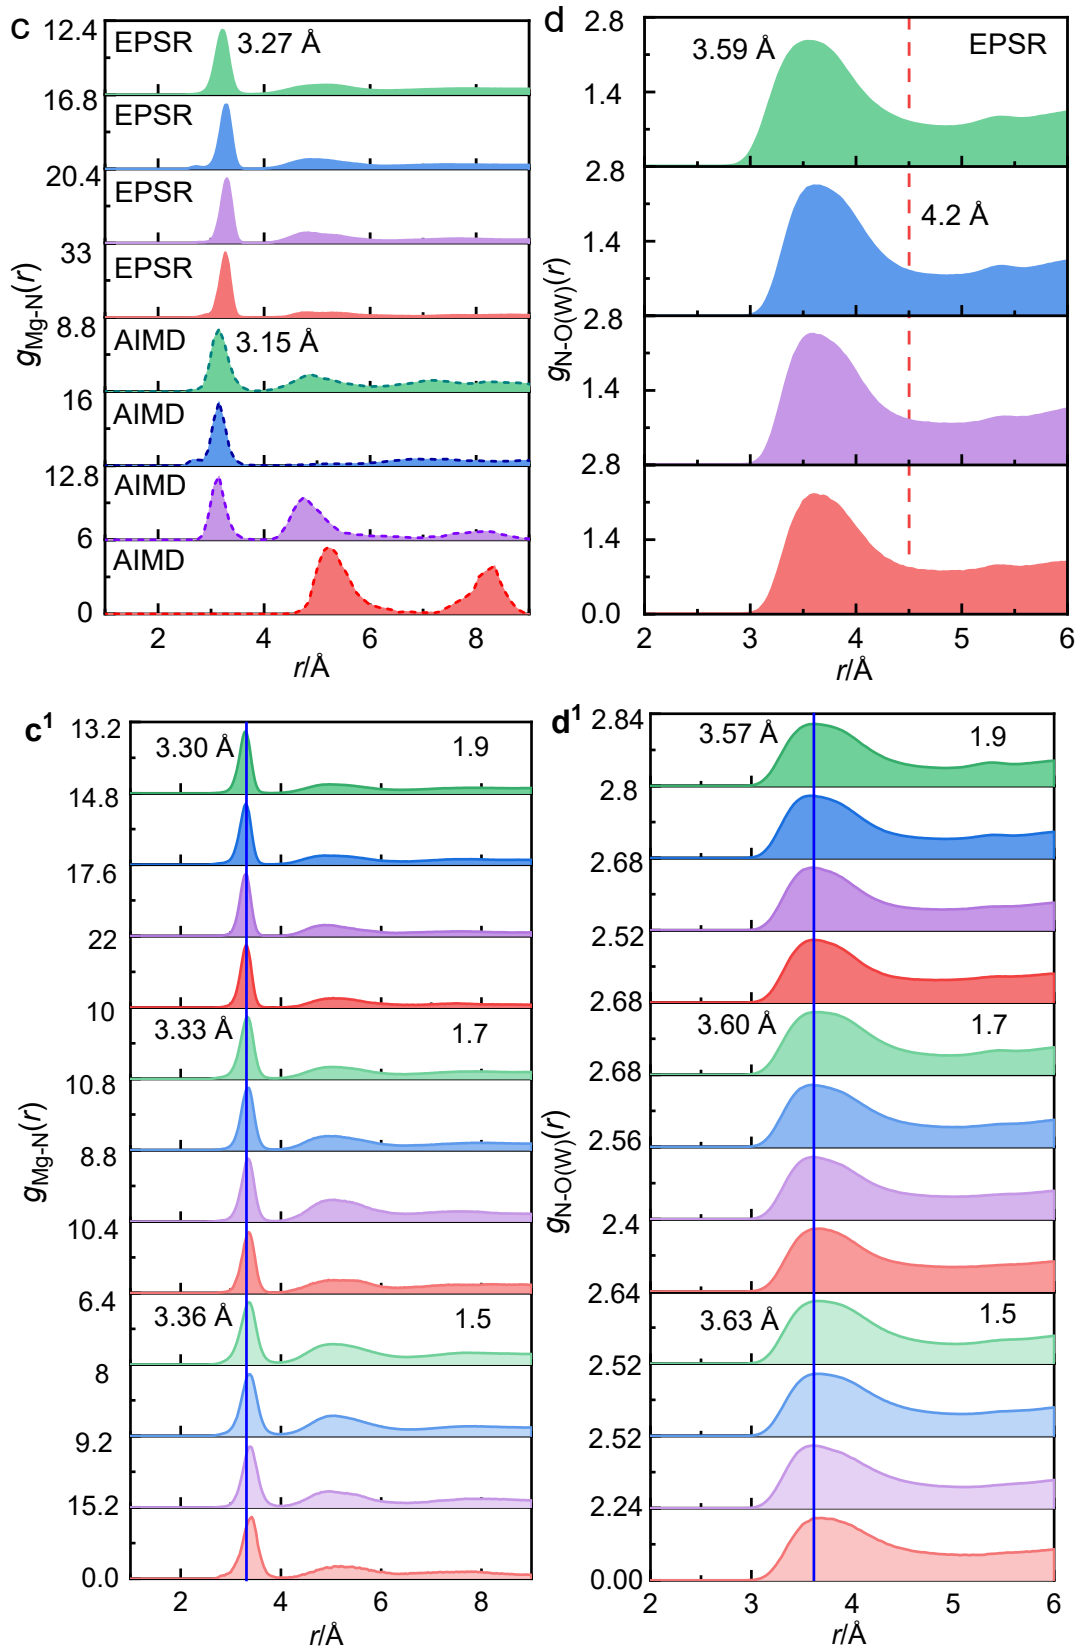

**Fig. S3.** Pair distribution functions of Mg–O(W), Mg–O(N), Mg–N and N–O(W) at different WSR in Mg(NO<sub>3</sub>)<sub>2</sub> solutions obtained from EPSR with a full charge (a, b, c, d) and scaled charges of ions (a<sup>1</sup>, b<sup>1</sup>, c<sup>1</sup>, d<sup>1</sup>).

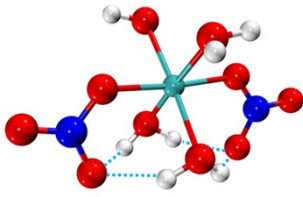

2M1-a

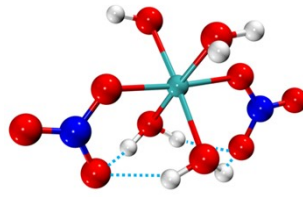

2M1-b

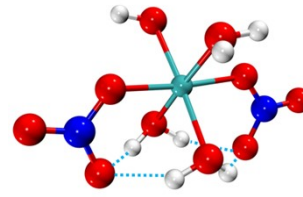

2M1-c

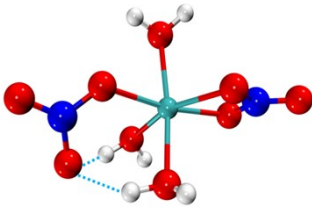

MB-a

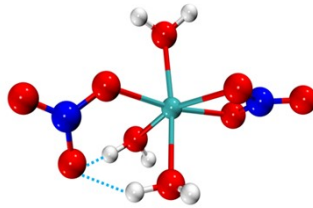

MB-b

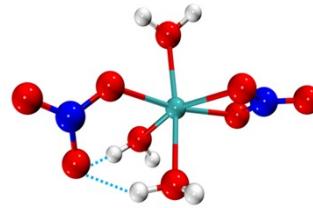

MB-c

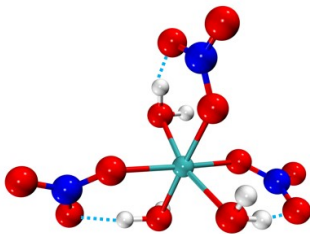

3M-a

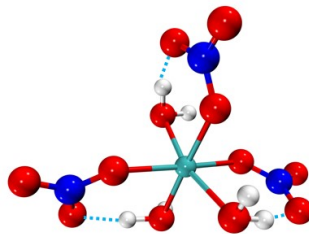

3M-b

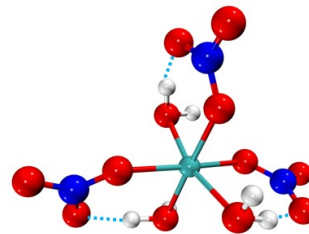

3M-c

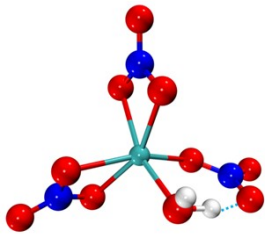

M2B-a

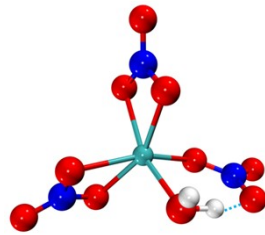

M2B-b

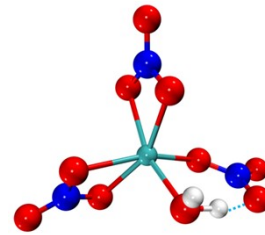

M2B-c

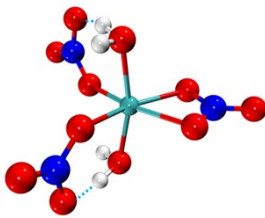

2MB-a

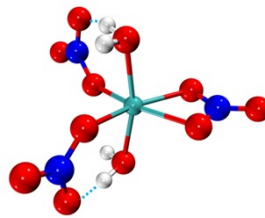

2MB-b

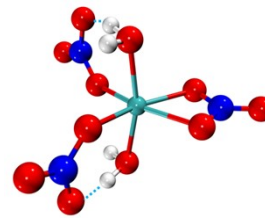

2MB-c

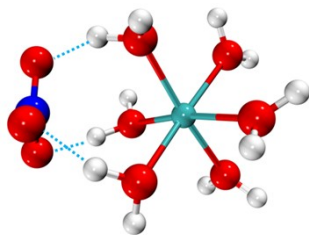

S-a

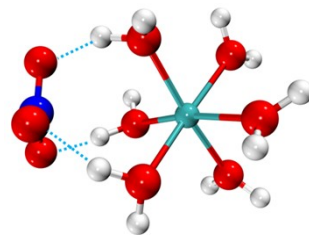

S-b

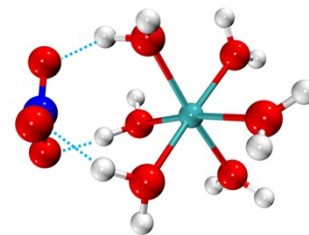

S-c



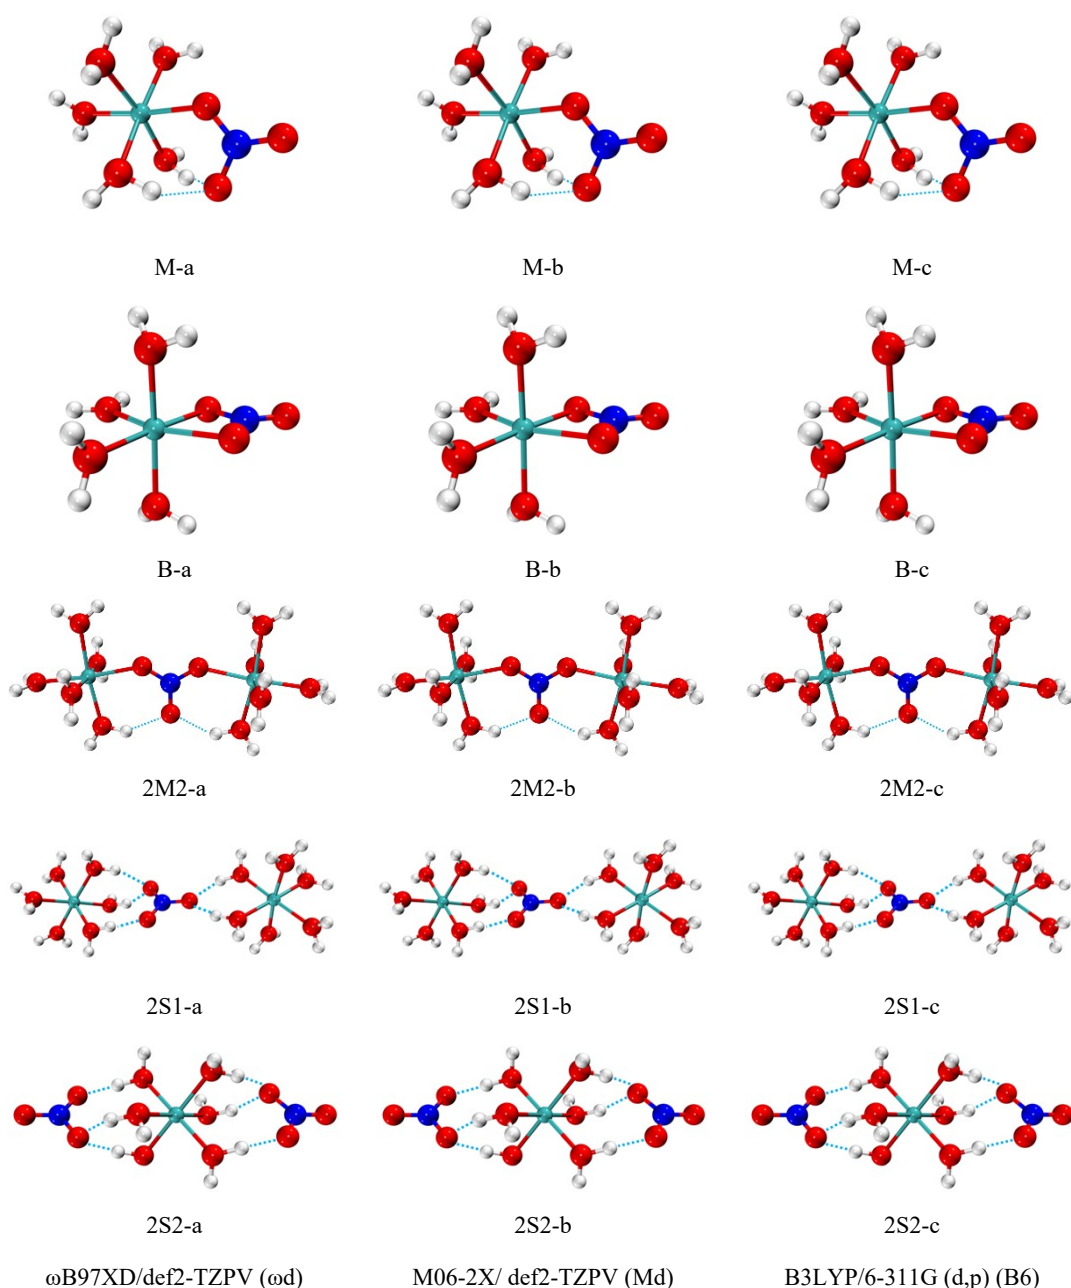

**Fig. S4.** Ion pairs and multiple ion clusters  $[\text{Mg}^{2+}_m(\text{NO}_3)_n(\text{H}_2\text{O})_q]$  calculated at three different method/basis sets (abbreviation). The column on the left is calculated at  $\omega\text{B97XD/def2-TZPV}$  ( $\omega\text{d}$ ), The middle column is calculated at  $\text{M06-2X/ def2-TZPV}$  ( $\text{Md}$ ) and the column on the right is calculated at  $\text{B3LYP/6-311G (d,p)}$  ( $\text{B6}$ ).

Fig. S4 shows that the same structures of  $[\text{Mg}^{2+}_m(\text{NO}_3)_n(\text{H}_2\text{O})_q]$  were obtained at different method basis sets. Moreover, the bond lengths, vibration frequencies and energies are also listed in Table S6 and S7. These values of the same structure under different method basis sets are close to each other and the variation trend of different structures is basically the same. Therefore, it can be concluded that the method/basis set chosen in this work is appropriate to describe the structures.

**Table S6** Atomic distances of ion pairs and multiple ion clusters calculated at different levels.

| $d_{\text{Mg-ON}}(\text{\AA})$ | $d_{\text{Mg-N}}(\text{\AA})$ | $d_{\text{Mg-OW}}(\text{\AA})$ |
|--------------------------------|-------------------------------|--------------------------------|
|--------------------------------|-------------------------------|--------------------------------|

|     | $\omega$ d | Md    | B6    |   | $\omega$ d | Md    | B6    |   | $\omega$ d | Md    | B6    |
|-----|------------|-------|-------|---|------------|-------|-------|---|------------|-------|-------|
| 2M1 | 2.039      | 2.014 | 2.056 | C | 2.968      | 2.943 | 2.993 |   | 2.119      | 2.075 | 2.127 |
|     | 3.094      | 3.068 | 3.113 | S |            |       |       |   |            |       |       |
| MB  | 2.095      | 2.069 | 2.122 | B | 2.487      | 2.458 | 2.524 | B | 2.110      | 2.064 | 2.113 |
|     | 2.058      | 2.026 | 2.076 | M | 2.992      | 2.959 | 3.020 | M |            |       |       |
|     | 3.115      | 3.083 | 3.138 | S |            |       |       |   |            |       |       |
| 3M  | 2.093      | 2.06  | 2.101 | C | 3.113      | 3.073 | 3.155 |   | 2.104      | 2.062 | 2.109 |
|     | 3.360      | 3.319 | 3.411 | S |            |       |       |   |            |       |       |
| M2B | 2.122      | 2.088 | 2.147 | B | 2.510      | 2.471 | 2.544 | B | 2.089      | 2.045 | 2.096 |
|     | 2.044      | 2.015 | 2.063 | M | 3.071      | 3.036 | 3.110 | M |            |       |       |
|     | 3.335      | 3.297 | 3.384 | S |            |       |       |   |            |       |       |
| 2MB | 2.116      | 2.084 | 2.143 | B | 2.503      | 2.466 | 2.539 | B | 2.103      | 2.061 | 2.105 |
|     | 2.081      | 2.046 | 2.100 | M | 3.116      | 3.080 | 3.147 | M |            |       |       |
|     | 3.373      | 3.338 | 3.406 | S |            |       |       |   |            |       |       |
| S   | 3.641      | 3.592 | 3.691 |   | 3.452      | 3.403 | 3.501 |   | 2.104      | 2.066 | 2.108 |
| M   | 2.020      | 1.999 | 2.040 | C | 2.941      | 2.921 | 2.968 |   | 2.103      | 2.061 | 2.115 |
|     | 3.038      | 3.021 | 2.056 | S |            |       |       |   |            |       |       |
| B   | 2.056      | 2.035 | 2.084 |   | 2.453      | 2.429 | 2.491 |   | 2.103      | 2.059 | 2.112 |
| 2M2 | 2.153      | 2.109 | 2.177 | M | 3.181      | 3.135 | 3.216 |   | 2.088      | 2.049 | 2.000 |
|     | 3.481      | 3.438 | 3.521 | S |            |       |       |   |            |       |       |
| 2S2 | 3.766      | 3.730 | 3.807 |   | 4.243      | 4.206 | 4.296 |   | 2.087      | 2.049 | 2.100 |
| 2S1 | 3.884      | 3.854 | 3.924 |   | 4.692      | 4.659 | 4.745 |   | 2.095      | 2.055 | 2.111 |

$\omega$ d,  $\omega$ B97XD/def2-TZPV; Md, M06-2X/ def2-TZPV; B6, B3LYP/6-311G (d, p).

**Table S7** Zero Point energy of ion pairs and multiple ion clusters calculated at different levels.

| Zero Point Energy (a.u.) |            |            |            |     |            |            |            |
|--------------------------|------------|------------|------------|-----|------------|------------|------------|
|                          | $\omega$ d | Md         | B6         |     | $\omega$ d | Md         | B6         |
| 2M1                      | -1066.6088 | -1066.5339 | -1066.8177 | M   | -862.4758  | -862.4042  | -862.6433  |
| MB                       | -990.1746  | -990.1077  | -990.3655  | B   | -786.0361  | -785.9730  | -786.1848  |
| 3M                       | -1270.6261 | -1270.5443 | -1270.8816 | 2M2 | -1444.1906 | -1444.0574 | -1444.4652 |
| M2B                      | -1117.7611 | -1117.6970 | -1117.9770 | 2S2 | -1219.4760 | -1219.3794 | -1219.7234 |
| 2MB                      | -1194.1965 | -1194.1235 | -1194.4326 | 2S1 | -1597.0896 | -1596.9358 | -1597.4022 |
| S                        | -938.8328  | -938.7554  | -939.0867  |     |            |            |            |

$\omega$ d,  $\omega$ B97XD/def2-TZPV; Md, M06-2X/ def2-TZPV; B6, B3LYP/6-311G (d, p).

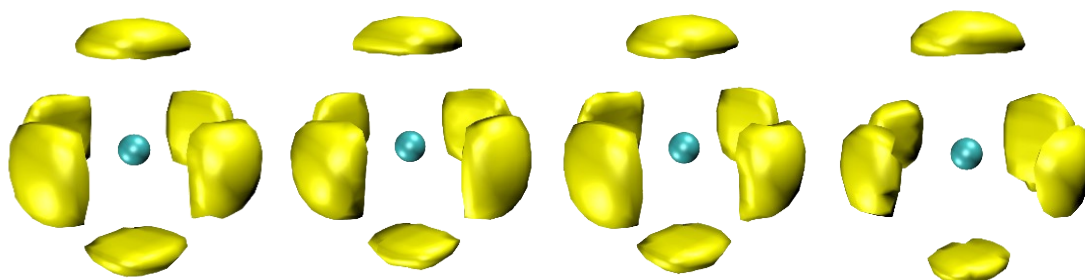

WSR = 100 1.8-3.5 Å 0.6    WSR = 60 1.8-3.5 Å 0.6    WSR = 30 1.8-3.5 Å 0.8    WSR = 15 1.8-3.6 Å 0.8

**Fig. S5.** SDFs of the distribution of water molecules in the 1.8–3.5 Å range around  $\text{Mg}^{2+}$ . From left panel to right panel are WSR=100, 60,30,15 respectively. The yellow block represents the first hydration layer of  $\text{Mg}^{2+}$ , which fractional isosurface level is 0.6 and 0.8 respectively, and the green ball in the middle represents  $\text{Mg}^{2+}$ .

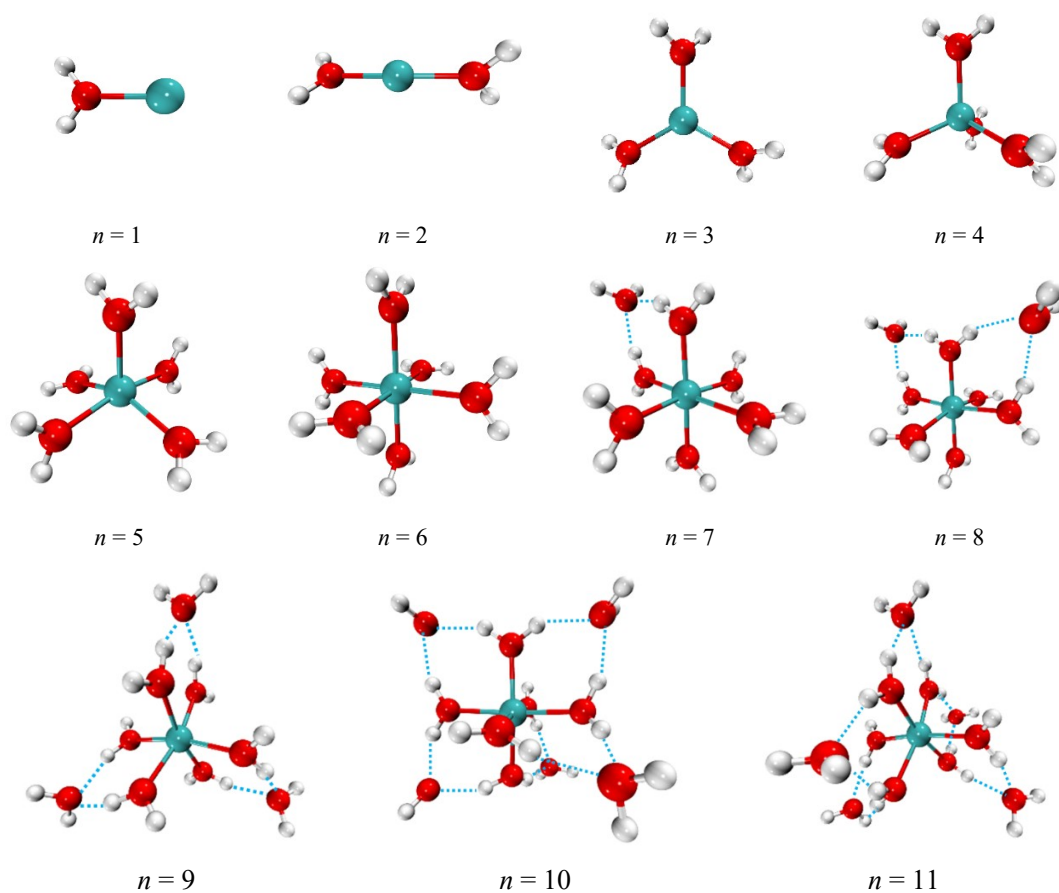

**Fig. S6.** DFT optimized magnesium hydrate structure.

**Table S8** Continuous hydration related energy data of magnesium ions.

| N | $E_{0b}$ | $E_{Tb}$ | $H_{Tb}$ | $G_{Tb}$ | $\Delta E_0$ | $\Delta E_T$ | $\Delta H_T$ | $\Delta G_T$ |
|---|----------|----------|----------|----------|--------------|--------------|--------------|--------------|
| 1 | 310.7794 | 313.2604 | 315.7415 | 287.3284 | 310.7794     | 313.2604     | 315.7415     | 287.3284     |
| 2 | 296.2473 | 297.3566 | 299.8377 | 268.8056 | 281.7153     | 281.4528     | 283.9339     | 250.2829     |
| 3 | 274.1383 | 274.9260 | 277.4071 | 244.8552 | 229.9203     | 230.0647     | 232.5458     | 196.9545     |
| 4 | 253.1861 | 253.7211 | 256.2022 | 222.0221 | 190.3295     | 190.1063     | 192.5874     | 153.5226     |
| 5 | 229.2575 | 230.0011 | 232.4822 | 195.8197 | 133.5431     | 135.1210     | 137.6021     | 91.0100      |

|    |          |          |          |          |          |          |          |         |
|----|----------|----------|----------|----------|----------|----------|----------|---------|
| 6  | 211.6323 | 212.3119 | 214.7930 | 176.8055 | 123.5065 | 123.8662 | 126.3473 | 81.7348 |
| 7  | 194.1386 | 194.7507 | 197.2318 | 159.5889 | 89.1758  | 89.3832  | 91.8643  | 56.2888 |
| 8  | 181.1281 | 181.8885 | 184.3696 | 145.5631 | 90.0549  | 91.8534  | 94.3345  | 47.3826 |
| 9  | 170.7434 | 171.6165 | 174.0976 | 134.8849 | 87.6654  | 89.4402  | 91.9213  | 49.4591 |
| 10 | 160.2173 | 161.0060 | 163.4871 | 124.3433 | 65.4832  | 65.5121  | 67.9932  | 29.4692 |
| 11 | 151.4549 | 152.1531 | 154.6342 | 115.5147 | 63.8309  | 63.6235  | 66.1046  | 27.2288 |

**Table S9** The first and second hydration layer radii ( $r_1$  and  $r_2$ ) and the Mulliken charge of Mg of magnesium hydrate ion.

| $n$ | $r_1$  | Mulliken Charge of |  | $n$ | $r_1$  | $r_2$  | Mulliken Charge of |  |
|-----|--------|--------------------|--|-----|--------|--------|--------------------|--|
|     |        | Mg                 |  |     |        |        | Mg                 |  |
| 1   | 1.9562 | 1.6699             |  | 7   | 2.1104 | 3.9048 | 0.9201             |  |
| 2   | 1.9724 | 1.4282             |  | 7   | 2.1040 | 3.9128 | 0.9196             |  |
| 3   | 1.9967 | 1.2770             |  | 9   | 2.1025 | 3.9711 | 0.9066             |  |
| 4   | 2.0254 | 1.0717             |  | 10  | 2.1030 | 3.9571 | 0.9293             |  |
| 5   | 2.0744 | 1.0450             |  | 11  | 2.1011 | 3.9110 | 0.8962             |  |
| 6   | 2.1091 | 0.9237             |  |     |        |        |                    |  |

Average energy ( $E_{0bn}$ ,  $E_{Tbn}$ ,  $H_{Tbn}$ ,  $G_{Tbn}$ ) and successive energy ( $\Delta E_{0n,n-1}$ ,  $\Delta E_{Tn,n-1}$ ,  $\Delta H_{Tn,n-1}$ ,  $\Delta G_{Tn,n-1}$ ) were computed according to

$$E_{0bn} = \{E_0(Mg^{2+}) + nE_0(H_2O) - E_0[Mg(H_2O)_n^{2+}]\}/n \quad (1)$$

$$E_{Tbn} = \{E_T(Mg^{2+}) + nE_T(H_2O) - E_T[Mg(H_2O)_n^{2+}]\}/n \quad (2)$$

$$H_{Tbn} = \{H_T(Mg^{2+}) + nH_T(H_2O) - H_T[Mg(H_2O)_n^{2+}]\}/n \quad (3)$$

$$G_{Tbn} = \{G_T(Mg^{2+}) + nG_T(H_2O) - G_T[Mg(H_2O)_n^{2+}]\}/nG \quad (4)$$

$$\Delta E_{0n,n-1} = E_0(H_2O) + E_0[Mg(H_2O)_{n-1}^{2+}] - E_0[Mg(H_2O)_n^{2+}] \quad (5)$$

$$\Delta E_{Tn,n-1} = E_T(H_2O) + E_T[Mg(H_2O)_{n-1}^{2+}] - E_T[Mg(H_2O)_n^{2+}] \quad (6)$$

$$\Delta H_{Tn,n-1} = H_T(H_2O) + H_T[Mg(H_2O)_{n-1}^{2+}] - H_T[Mg(H_2O)_n^{2+}] \quad (7)$$

$$\Delta G_{Tn,n-1} = G_T(H_2O) + G_T[Mg(H_2O)_{n-1}^{2+}] - G_T[Mg(H_2O)_n^{2+}] \quad (8)$$

$E_0$ , Sum of electronic and zero-point energies;  $E_T$ , Sum of electronic and thermal energies;  $H_T$ , Sum of electronic and thermal enthalpies;  $G_T$ , Sum of electronic and thermal free energies. all energy data corrected by BSSE.

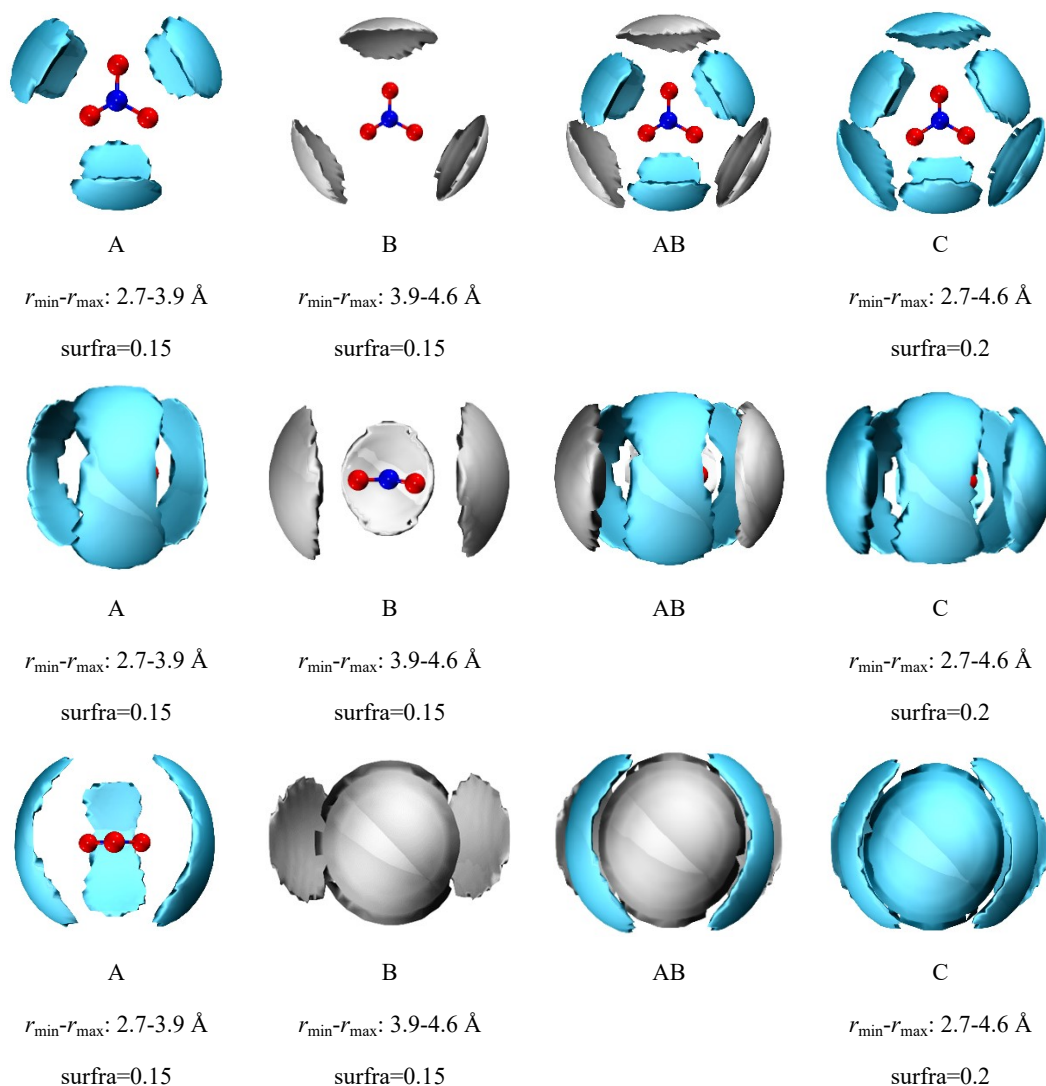

**Fig. S7.** The spatial density functions (SDFs) of water molecules around the  $\text{NO}_3^-$  with a fractional isosurface value of 0.15 at different perspectives. The purple and silver leaf petals represent the probability density of water molecules in the range of 2.7-3.9 Å (A) and 3.9-4.6 Å (B), respectively; gray blue represents the probability density of water molecules in the range of 2.7-4.6 Å (C). Picture AB is the superposition of picture A and picture B. The blue and red balls in the center represent the N and O atoms of  $\text{NO}_3^-$ , respectively.

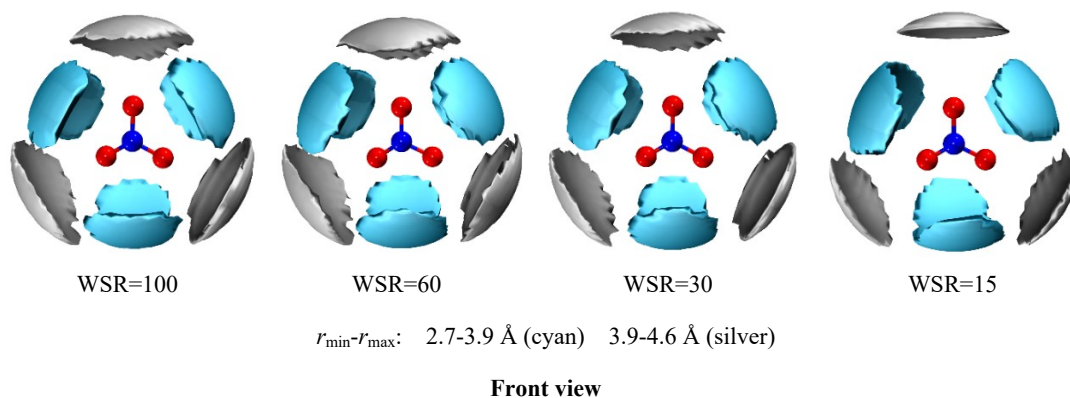

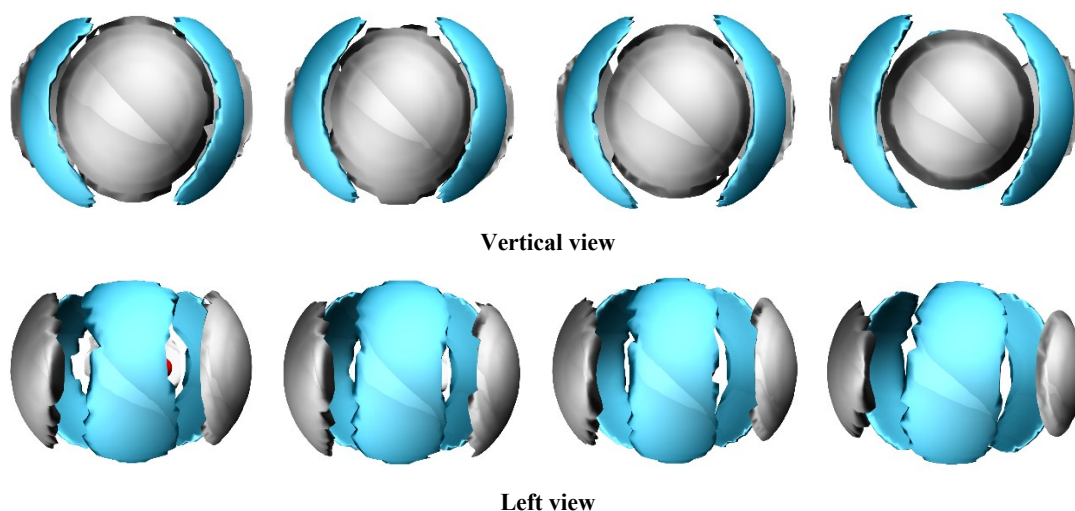

**Fig. S8.** The spatial density functions (SDFs) of water molecules around the  $\text{NO}_3^-$  with a fractional isosurface value of 0.15 at different perspectives. The main, top, and left views of SDFs.

As shown in Figs. S7 and S8, the SDFs of water molecules were calculated within a cutoff distance of 2.6-4.6 Å around the  $\text{NO}_3^-$ , and truly showed two kinds of hydrated regions as shown in Fig.8. Therefore, the hydrated regions were divided into two kinds: 2.6-3.9 Å as the direct hydration region and 3.9-4.6 Å as the nearest neighbor attachment hydration region. And we distinguish the two kinds of hydration by different colors with a fractional isosurface value of 0.15.

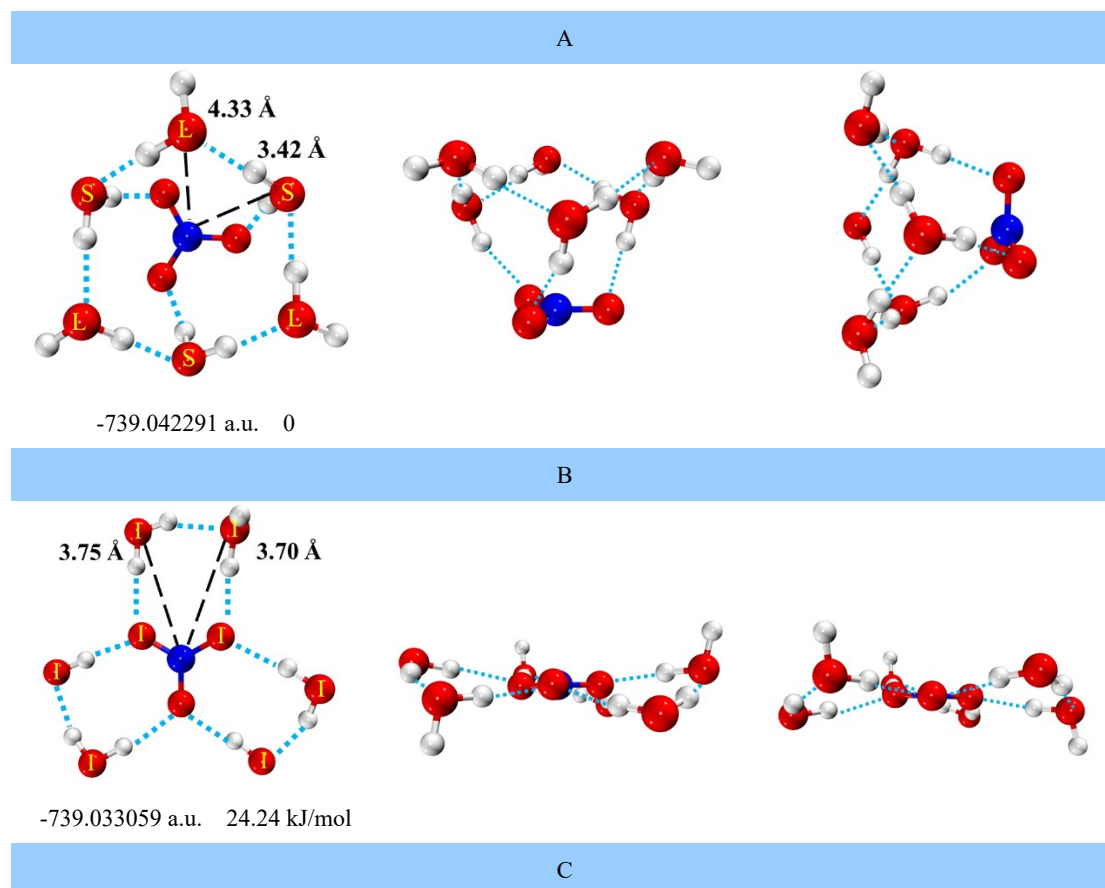

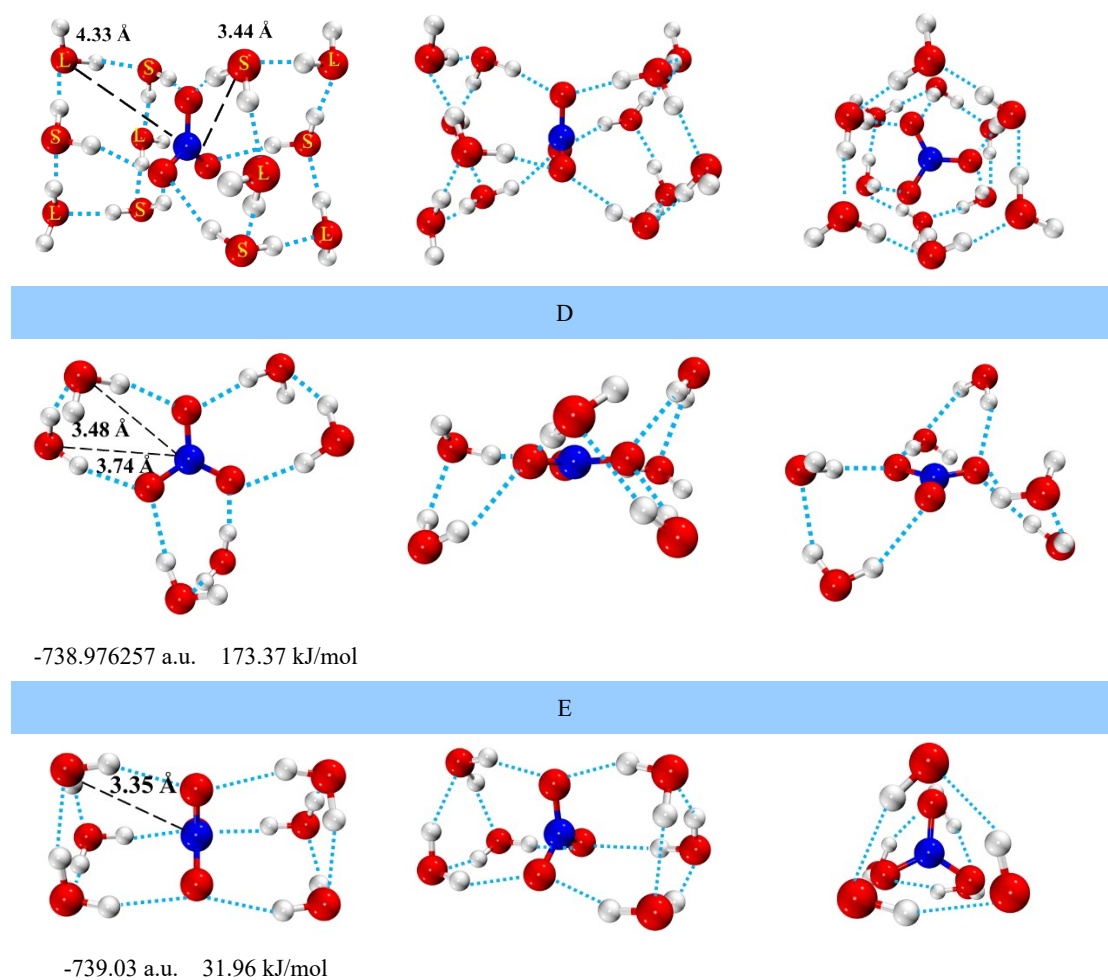

**Fig. S9.** Multi-angle view of the hydration structure models of  $[\text{NO}_3 (\text{H}_2\text{O})_x]^-$  ( $x = 6, 12$ ) calculated by DFT. The sum of electronic and zero-point energies, and the difference in energy between the isomer and the lowest energy structure were listed below every structure.

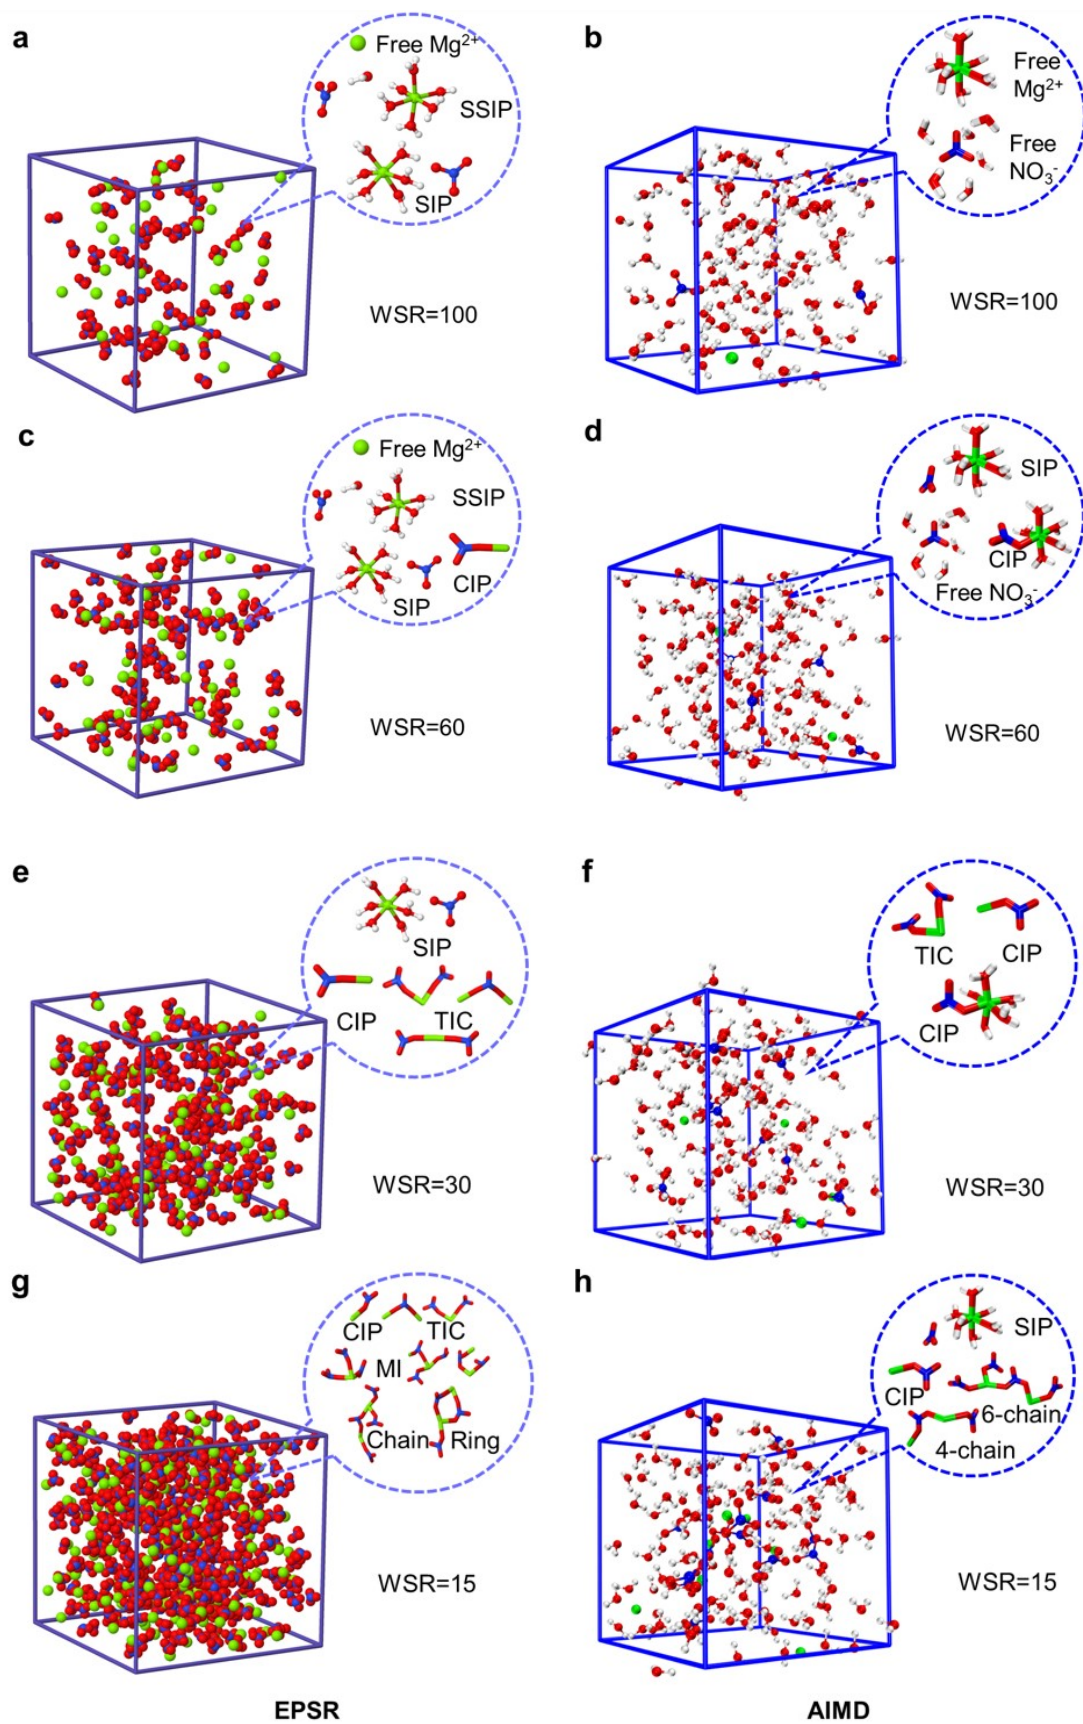

**Fig. S10.** EPSR (a, c, e, g) and AIMD (b, d, f, h) simulation boxes of magnesium nitrate solutions at different concentrations and the main microscopic species in each box.



## References

- 1 R. Caminiti, G. Licheri, G. Piccaluga and G. Pinna, *Chem. Phys. Lett*, 1979, **61** (1): 45-49.
- 2 E. Duboué-Dijon, P. E. Mason, H. E. Fischer, P. Jungwirth, *J. Phys. Chem. B*, 2018, **122** (13): 3296-3306.
- 3 F. Bruni, S. Imberti, R. Mancinelli, M. A. Ricci, *J. Chem. Phys*, 2012, **136** (6): 137-48.
- 4 S. Riahi, B. Roux, C. N. Rowley. *Can. J. Chem*, 2013, **91** (7): 552-558.
- 5 I. Waluyo, C. Huang, D. Nordlund, U. Bergmann, T. M. Weiss, L. G. M. Pettersson, A. Nilsson, *J. Chem. Phys*, 2011, **134** (6): 064513.
- 6 W. Bol, G. J. A. Gerrits, C. L. van Panthaleon van Eck, *J. Appl. Cryst*, 1970, **3**: 486-492.
- 7 R. Caminiti, *J. Mol. Liq*, 1984, **28** (3): 191-204.
